# Supplementary material for: A cascade of magnetic phase transitions and a 1/3-magnetization plateau in selenite–selenate Co3(SeO3)(SeO4)(OH)2 with kagomé-like Co2+ ion layer arrangements: the importance of identifying a correct spin lattice
Source: Royal Society of Chemistry journal article supplement (doi:10.1039/d3dt01620j), 2023-01-01
Supplement: d3dt01620j1.pdf [file d3dt01620j1.pdf]

Supporting information

for

**Cascade of Magnetic Phase Transitions and 1/3-Magnetization Plateau in Selenite-Selenate  $\text{Co}_3(\text{SeO}_3)(\text{SeO}_4)(\text{OH})_2$  with Layers of a Kagomé-like  $\text{Co}^{2+}$  Ion Arrangement: Importance of Identifying a Correct Spin Lattice**

A.F. Murtazoev,<sup>a,b</sup> P.S. Berdonosov,<sup>a,b</sup> K.A. Lyssenko,<sup>a,c</sup> V.A. Dolgikh,<sup>a</sup> M.Y. Geidorf,<sup>a,b</sup> O.S. Volkova,<sup>a,b</sup> H.-J. Koo,<sup>d</sup> M.-H. Whangbo,<sup>d,e</sup> A.N. Vasiliev<sup>b</sup>

<sup>a</sup> Lomonosov Moscow State University, Moscow 119991, Russia

<sup>b</sup> National University of Science and Technology “MISIS”, Moscow 119049, Russia

<sup>c</sup> Plekhanov Russian University of Economics, Moscow 117997, Russia

<sup>d</sup> Department of Chemistry and Research Institute for Basic Sciences, Kyung Hee University, Seoul 02447, Republic of Korea

<sup>e</sup> Department of Chemistry, North Carolina State University, Raleigh, NC 27695-8204, USA

**S1. Supplementary figures**

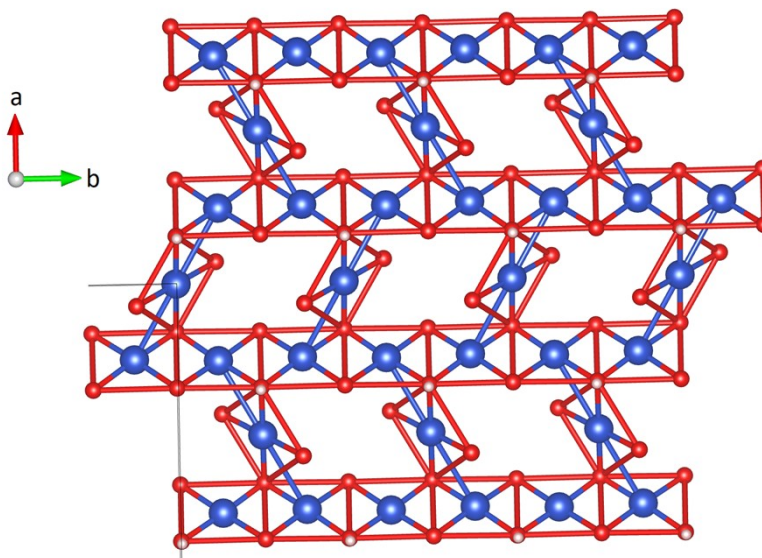

**Fig. S1.** The kagomé-like arrangement of the  $\text{Cu}^{2+}$  ions in volborthite  $\text{Cu}_3\text{V}_2\text{O}_7(\text{OH})_2 \cdot 2\text{H}_2\text{O}$ . The three different orientations of the  $\text{CuO}_4$  square planes possessing the  $x^2-y^2$  magnetic orbitals are emphasized to show that the correct spin lattice is not a kagomé spin lattice, but superposed three-leg spin ladders. Volborthite is perfectly described by a spin-half antiferromagnetic uniform Heisenberg chain model.

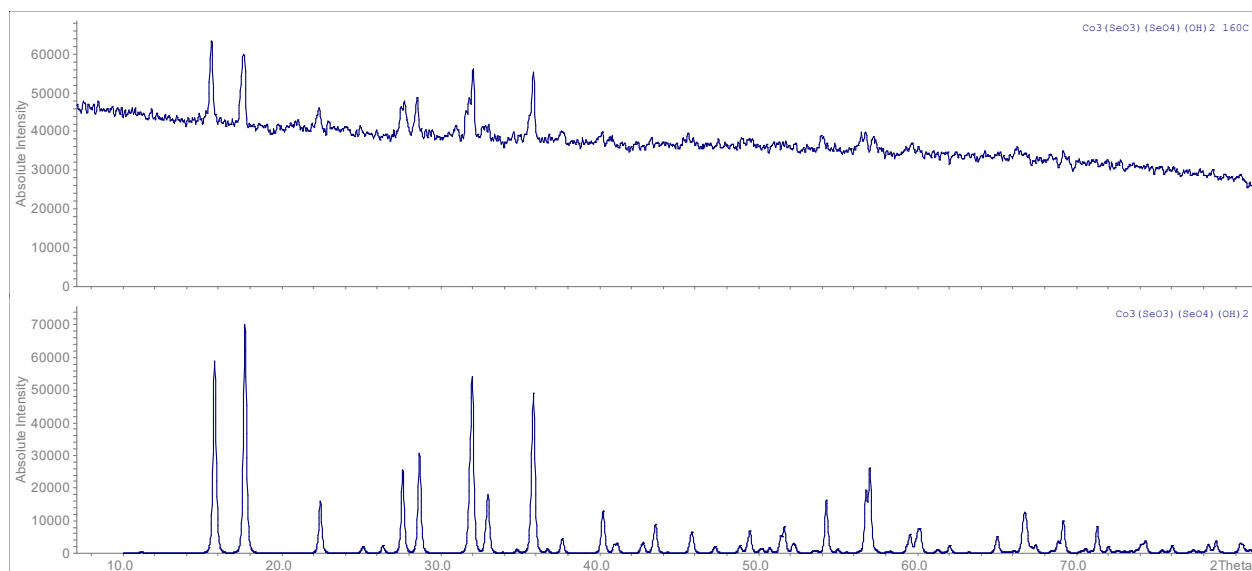

**Fig. S2.** Comparison of Powder XRD for hydrothermally prepared sample of  $\text{Co}_3(\text{SeO}_3)(\text{SeO}_4)(\text{OH})_2$  (upper panel) and simulated from single crystal data experiment at  $\text{Cu K}\alpha_1$  radiation (lower panel).

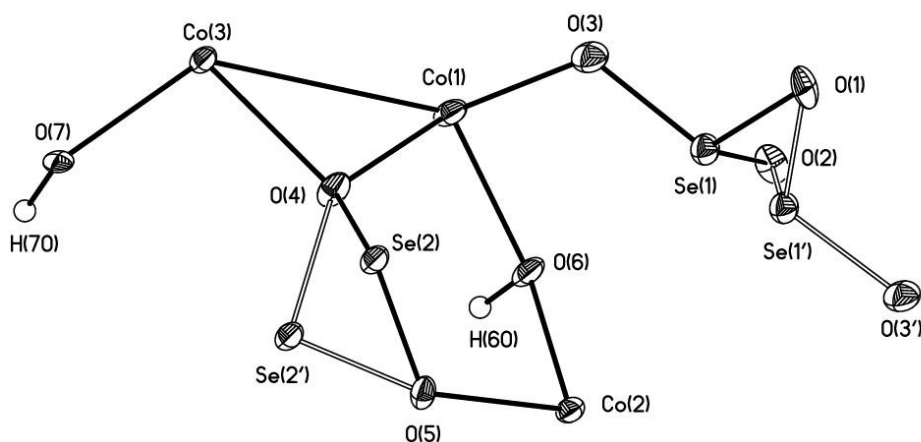

**Fig. S3.** Asymmetric unit for  $\text{Co}_3(\text{SeO}_3)(\text{SeO}_4)(\text{OH})_2$ .

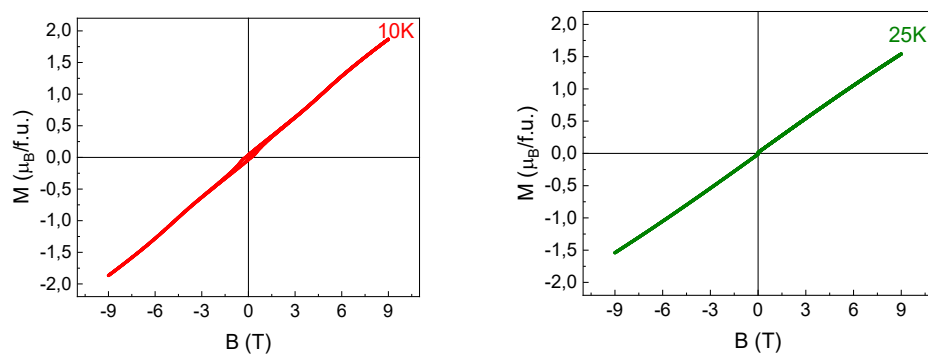

**Fig. S4.** Hysteresis loops in  $\text{Co}_3(\text{SeO}_3)(\text{SeO}_4)(\text{OH})_2$  at various temperatures.

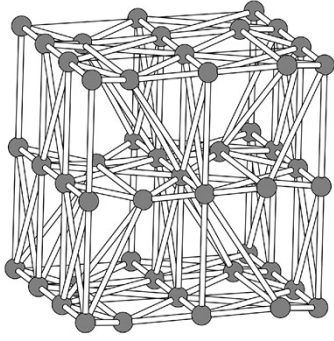

FM

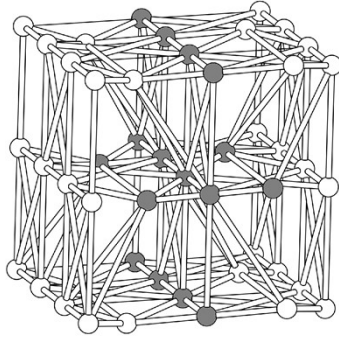

AF1

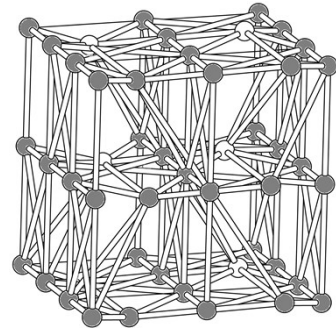

AF2

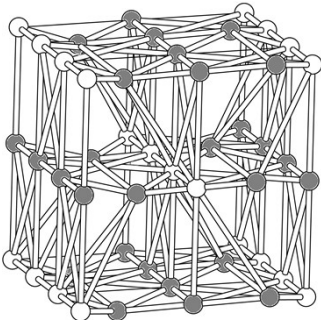

AF3 ( $E_3$ )

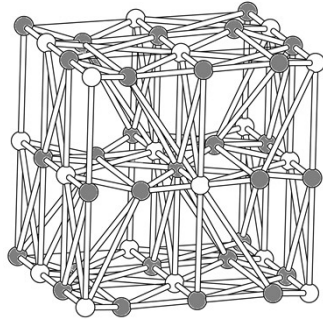

AF4

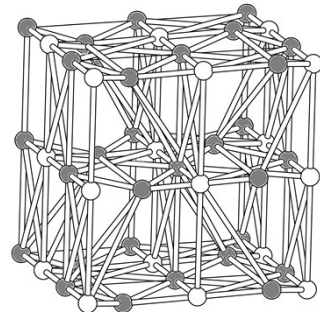

AF5 ( $E_1$ )

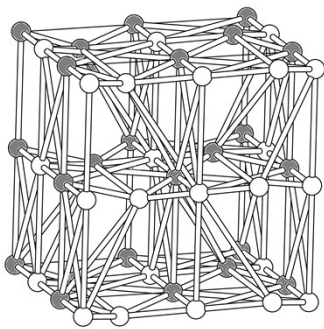

AF6 (GS)

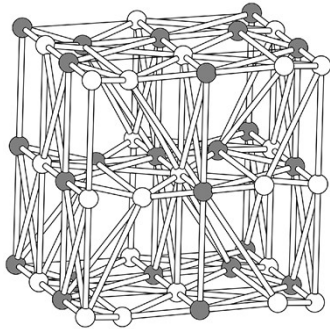

AF7

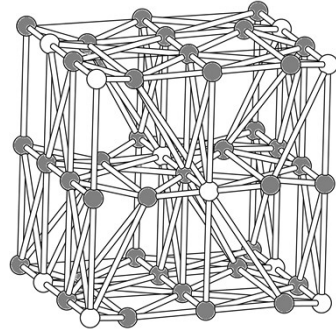

AF8

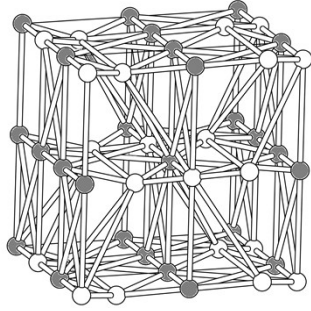

AF9 (E2)

**Fig. S5.** 10 ordered spin states of  $\text{Co}_3(\text{SeO}_3)(\text{SeO}_4)(\text{OH})_2$  employed for the energy-mapping analysis. In the text, the AF6, AF5, AF9 and AF3 arrangements are referred to as the GS,  $E_1$ ,  $E_2$  and  $E_3$  states, respectively.

## S2. Supplementary tables

**Table S1.** Atomic coordinates ( $\times 10^4$ ) and equivalent isotropic displacement parameters ( $\text{\AA}^2 \times 10^3$ ) for  $\text{Co}_3(\text{SeO}_3)(\text{SeO}_4)(\text{OH})_2$ .  $U(\text{eq})$  is defined as one third of the trace of the orthogonalized  $U_{ij}$  tensor.

|        | x        | y        | z         | U(eq) |
|--------|----------|----------|-----------|-------|
| Co(1)  | 4507(2)  | 2500     | 2867(2)   | 12(1) |
| Co(2)  | 5000     | 5000     | 0         | 11(1) |
| Co(3)  | 5000     | 5000     | 5000      | 10(1) |
| Se(1)  | 2603(1)  | 2500     | 813(1)    | 12(1) |
| Se(2)  | 4145(1)  | 7500     | 2438(1)   | 11(1) |
| Se(2') | 5601(8)  | 7500     | 2516(6)   | 11(1) |
| O(1)   | 1156(7)  | 2500     | 534(9)    | 15(2) |
| O(2)   | 3164(6)  | 381(9)   | 223(6)    | 14(2) |
| O(3)   | 2766(9)  | 2500     | 2261(8)   | 16(2) |
| O(4)   | 4805(6)  | 5511(10) | 3189(6)   | 15(2) |
| O(5)   | 4943(6)  | 7500     | 1181(7)   | 11(2) |
| O(6)   | 5289(9)  | 2500     | 1223(8)   | 14(2) |
| O(7)   | 6021(8)  | 7500     | 5347(8)   | 10(2) |
| Se(1') | 2448(7)  | 2500     | -146(11)  | 12(1) |
| O(3')  | 2223(19) | 2500     | -1587(10) | 16(2) |

**Table S2.** Values of  $n_i$  in the energy expressions, FM and  $\text{AF}_i$  ( $i = 1 - 9$ ) of  $\text{Co}_3(\text{SeO}_3)(\text{SeO}_4)(\text{OH})_2$

$$E_{spin} = - \sum_{i=1}^9 n_i J_i S^2, \text{ for the ordered spin states}$$

|     | $J_1$ | $J_2$ | $J_3$ | $J_4$ | $J_5$ | $J_6$ | $J_7$ | $J_8$ | $J_9$ |
|-----|-------|-------|-------|-------|-------|-------|-------|-------|-------|
| FM  | -8    | -8    | -16   | -16   | -8    | -16   | -16   | -16   | -16   |
| AF1 | -8    | -8    | -16   | 16    | -8    | 16    | 16    | -16   | -16   |
| AF2 | -8    | -8    | 0     | 0     | 8     | -16   | 0     | -16   | -16   |
| AF3 | -8    | -8    | -16   | 16    | -8    | 16    | -16   | 16    | 16    |
| AF4 | 8     | 8     | 0     | 0     | -8    | -16   | 0     | 16    | -16   |
| AF5 | 8     | 8     | 0     | 0     | -8    | 16    | 0     | -16   | 16    |
| AF6 | 8     | 8     | 0     | 0     | 8     | 16    | 0     | -16   | 16    |
| AF7 | 8     | 8     | 0     | 0     | 8     | -16   | 0     | -16   | 16    |
| AF8 | -8    | 8     | 0     | -16   | -8    | 0     | 0     | 0     | 0     |
| AF9 | -8    | 8     | 0     | 16    | -8    | 0     | 0     | 0     | 0     |

**Table S3.** Relative energies (in meV/FU) of the 10 ordered spin states obtained from DFT+U calculations

|          | $U_{\text{eff}} = 3 \text{ eV}$ | $U_{\text{eff}} = 4 \text{ eV}$ |
|----------|---------------------------------|---------------------------------|
| FM       | 34.76                           | 26.14                           |
| AF1      | 9.50                            | 7.17                            |
| AF2      | 23.85                           | 18.33                           |
| AF3 (E3) | 4.25                            | 3.07                            |
| AF4      | 18.20                           | 13.99                           |
| AF5 (E1) | 2.84                            | 2.14                            |
| AF6 (GS) | 0                               | 0                               |
| AF7      | 8.16                            | 6.24                            |
| AF8      | 18.74                           | 14.00                           |
| AF9 (E2) | 3.40                            | 2.61                            |

In the text, the AF6, AF5, AF9 and AF3 arrangements are referred to as the GS, E<sub>1</sub>, E<sub>2</sub> and E<sub>3</sub> states, respectively.

### S3. Computational details

We carried out DFT calculations for the (a, 2b, c) supercell of Co<sub>3</sub>(SeO<sub>3</sub>)(SeO<sub>4</sub>)(OH)<sub>2</sub> using the frozen core projector augmented plane wave (PAW) [28, 29] encoded in the Vienna ab Initio Simulation Packages (VASP) [30] and the PBE potential [31] for the exchange-correlation functional. The electron correlation associated with the 3d states of Co was taken into consideration by DFT+U calculations with an effective on-site repulsion  $U_{\text{eff}} = U - J = 3$  and 4 eV [32] All our DFT+U calculations used the plane wave cutoff energy of 450 eV, a set of (4x4x4) *k*-points, and the threshold of 10<sup>-6</sup> eV for self-consistent-field energy convergence.

In terms of the spin Hamiltonian defined in Equation 1 of the text, the total spin exchange energies  $E$  per (a, 2b, c) supercell for each of the 10 ordered spin states can be written as

$$E_{\text{spin}} = - \sum_i n_i J_i S^2$$

where  $S=3/2$ , and  $i = 1 - 9$ . The values of  $n_i$  found for the 10 ordered spin states are listed in **Table S2**. We then carry out spin-polarized DFT+ $U$  calculations for the 10 ordered spin states to obtain their relative energies listed in **Table S3**. By mapping these relative energies on to the corresponding energies expressed in terms of the total spin exchange energies, we obtain the values of  $J_1 - J_9$  summarized in **Table 3**.
